# Supplementary material for: High Fidelity Elastic Green's Functions for Subduction Zone Models Consistent With the Global Standard Geodetic Reference System
Source: Research Square preprint supplement (doi:10.21203/rs.3.rs-89486/v1), 2020-10-12
Supplement: Supplementary file 1 [file b05d9f1f6f3aa527c86806d2.pdf]

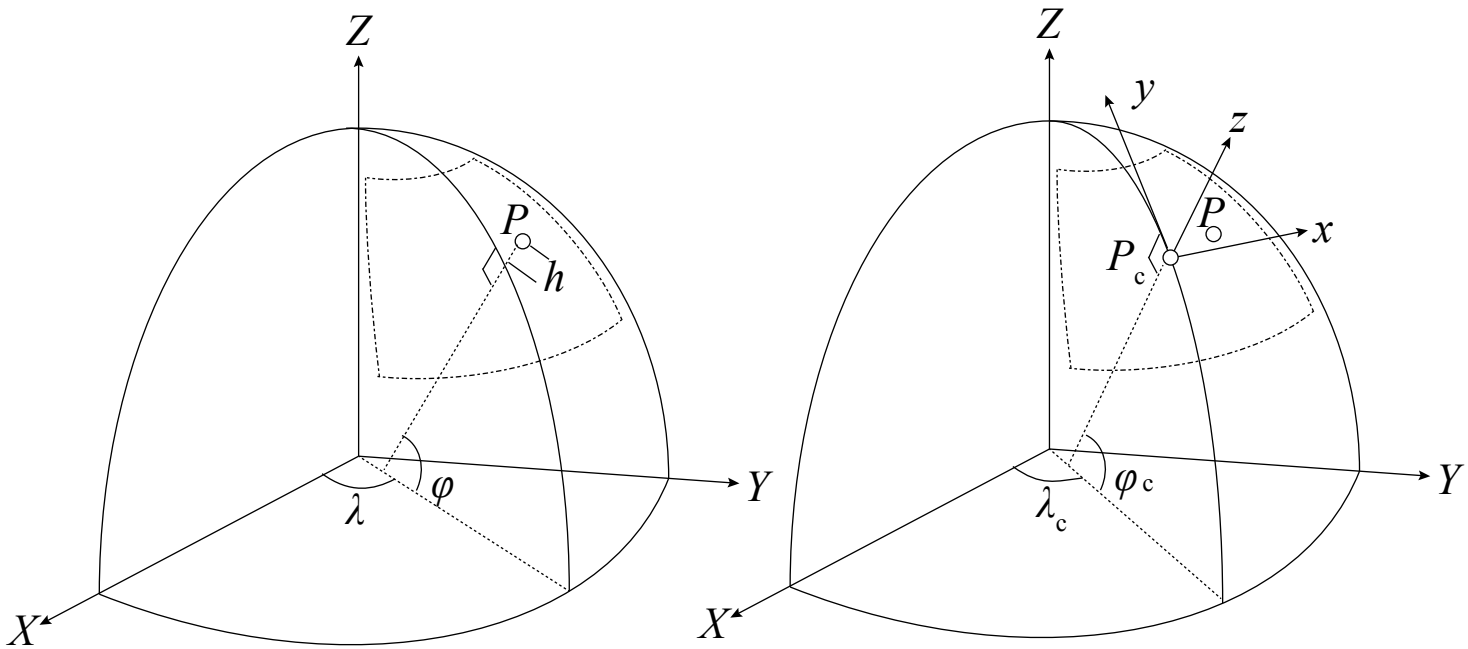

Coordinate transformation between the geographic and a Cartesian coordinate system consistent with the global standard geodetic reference system

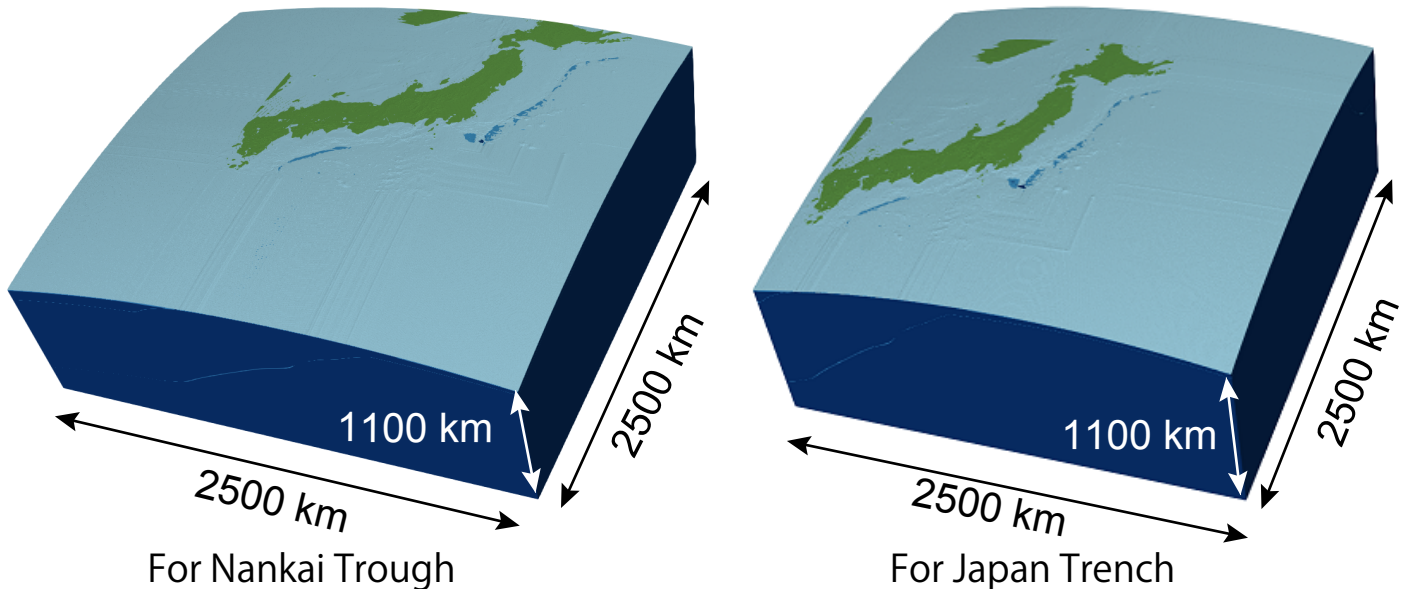

High fidelity subduction zone generated via coordinate transformation consistent with the global standard geodetic reference system
